# Supplementary material for: Development of a core measurement set for research in degenerative cervical myelopathy: a study protocol (AO Spine RECODE-DCM CMS)
Source: HighWire-hosted journal article supplement (doi:10.1136/bmjopen-2021-060436), 2022-06-01
Supplement: bmjopen-2021-060436supp001_data_supplement.pdf [file bmjopen-2021-060436supp001_data_supplement.pdf]

## SUPPLEMENTARY INFORMATION

### Supplementary Table 1. Inclusion and exclusion criteria for the systematic review.

| Inclusion                                                                                                                                                                                                    | Exclusion                                                                                                                                                                                                                       |
|--------------------------------------------------------------------------------------------------------------------------------------------------------------------------------------------------------------|---------------------------------------------------------------------------------------------------------------------------------------------------------------------------------------------------------------------------------|
| <b>Publication type</b>                                                                                                                                                                                      |                                                                                                                                                                                                                                 |
| <ul style="list-style-type: none"> <li>• Article written in English</li> <li>• Primary clinical research articles</li> </ul>                                                                                 | <ul style="list-style-type: none"> <li>• Article not written in English</li> <li>• Conference abstracts or posters</li> <li>• Editorials, commentaries, opinion papers or letters</li> <li>• Book chapters or theses</li> </ul> |
| <b>Study type</b>                                                                                                                                                                                            |                                                                                                                                                                                                                                 |
| <ul style="list-style-type: none"> <li>• Study includes primary clinical data</li> </ul>                                                                                                                     | <ul style="list-style-type: none"> <li>• Study uses only secondary data</li> <li>• Case reports</li> <li>• Narrative reviews</li> <li>• Systematic reviews</li> <li>• Meta-analyses</li> </ul>                                  |
| <b>Populations</b>                                                                                                                                                                                           |                                                                                                                                                                                                                                 |
| <ul style="list-style-type: none"> <li>• Human studies</li> </ul>                                                                                                                                            | <ul style="list-style-type: none"> <li>• Non-human studies</li> </ul>                                                                                                                                                           |
| <b>Indications</b>                                                                                                                                                                                           |                                                                                                                                                                                                                                 |
| <ul style="list-style-type: none"> <li>• Exclusively DCM (CSM, ossification of the posterior longitudinal ligament, cervical stenosis, spondylosis, spinal cord compression, cervical myelopathy)</li> </ul> | <ul style="list-style-type: none"> <li>• Populations with DCM and at least one other condition (e.g., radiculopathy)</li> </ul>                                                                                                 |
| <b>Comparator</b>                                                                                                                                                                                            |                                                                                                                                                                                                                                 |
| <ul style="list-style-type: none"> <li>• At least one assessment tool from (1-3)</li> </ul>                                                                                                                  |                                                                                                                                                                                                                                 |
| <b>Outcomes</b>                                                                                                                                                                                              |                                                                                                                                                                                                                                 |
| <ul style="list-style-type: none"> <li>• At least one psychometric property</li> <li>• At least one MCID or SCB</li> </ul>                                                                                   |                                                                                                                                                                                                                                 |

## REFERENCES

1. Kalsi-Ryan S, Singh A, Massicotte EM, Arnold PM, Brodke DS, Norvell DC, et al. Ancillary outcome measures for assessment of individuals with cervical spondylotic myelopathy. *Spine (Phila Pa 1976)*. 2013;38(22 Suppl 1):S111-22.
2. Davies BM, McHugh M, Elgheriani A, Koliass AG, Tetreault LA, Hutchinson PJA, et al. Reported Outcome Measures in Degenerative Cervical Myelopathy: A Systematic Review. *PLOS ONE*. 2016;11(8):e0157263.
3. Singh A, Tetreault L, Casey A, Laing R, Statham P, Fehlings MG. A summary of assessment tools for patients suffering from cervical spondylotic myelopathy: a systematic review on validity, reliability and responsiveness. *Eur Spine J*. 2015;24 Suppl 2:209-28.
